# Supplementary material for: Catalytic hydrogenation of CO2 from air via porous silica-supported Au nanoparticles in aqueous solution
Source: Royal Society of Chemistry journal article supplement (doi:10.1039/d0gc04303f), 2021-01-01
Supplement: d0gc04303f1.pdf [file d0gc04303f1.pdf]

1 **Supporting Information for**

2 **Catalytic hydrogenation of CO<sub>2</sub> from air via porous silica-**  
3 **supported Au nanoparticles in aqueous solution**

4 Siting Ni,<sup>a</sup> Jun Zhu,<sup>a</sup> Ranjan Roy,<sup>b</sup> Chao-Jun Li<sup>a</sup> and R. Bruce Lennox<sup>\*a</sup>

5 a. Department of Chemistry, McGill University, 801 Sherbrooke St. West, Montreal,  
6 Quebec H3A 0B8, Canada

7 b. Department of Chemical Engineering, McGill University, M.H. Wong Building,  
8 Montreal, Quebec H3A 0C5, Canada

9

11 **1. Materials and Methods**12 **2. Additional characterizations of Au/SiO<sub>2</sub>**13 *Fig. S1.* EDS characterization of porous SiO<sub>2</sub> and Au/SiO<sub>2</sub>.14 *Fig. S2.* UV-vis spectra of Au/SiO<sub>2</sub>, porous SiO<sub>2</sub> and AuNPs.15 *Fig. S3.* XPS survey scan.16 *Fig. S4.* TEM images of DMAP-AuNPs.17 *Fig. S5.* Stability test of the Au/SiO<sub>2</sub>.18 *Table S1.* Zeta potential of various samples.19 **3. The weight percentage of Au in the Au/SiO<sub>2</sub> composite**20 **4. Quantitative <sup>13</sup>C NMR**21 *Fig. S6.* <sup>13</sup>C NMR and T1 measurements.22 *Fig. S7.* NMR spectra of 3.2 wt. % PEHA CO<sub>2</sub> capture solution.23 *Fig. S8.* NMR spectra of 3.2 wt. % PEHA CO<sub>2</sub> capture solution after hydrogenation.24 **5. GC-TCD analysis of gas phase**25 *Table S2.* Retention time of various samples in GC-TCD26 *Fig. S9.* GC-TCD of the gas phase after a typical hydrogenation reaction.27 **6. Limit of Detection (LOD) and Limit of Analysis (LOA) Determination on GC-**  
28 **TCD**29 *Table S3.* Limits of detection (LOD) and limits of analysis (LOA) (ml) of gas standard.30 *Fig. S10.* Certificate of the gas standard used in the calibration curves and the  
31 determination of LOD and LOA.32 *Fig. S11.* Calibration curves.33 *Fig. S12.* Gas chromatograms of the gas standard with various injection volumes.34 *Fig. S13.* Gas chromatograms of the blank (no gas injection).35 **7. GC-MS identification and quantification of MeOH**

36 *Fig. S14.* GC-MS.

37 **8. Mechanistic studies:<sup>18</sup>O isotope study**

38 *Fig. S15.* Mass spectra.

39 *Fig. S16.* Calibration curve.

40 *Fig. S17.* Potential transformations in the isotope studies.

41 **9. Additional studies**

42 *Table S4.* Recently reported hydrogenation systems of amine-captured CO<sub>2</sub> to C1  
43 products in (partially) aqueous similar to this work.

44 *Table S5.* Study of CO<sub>2</sub> hydrogenation in dilute PEHA solutions.

45 *Fig. S18.* Catalytic activities with different Au loadings.

46 *Fig. S19.* Product distribution and conversion with various reaction times.

## 47 **1. Materials and Methods**

48 Hexadecyltrimethylammonium bromide (CTAB,  $\geq 99\%$ ), tetramethyl orthosilicate  
49 (TMOS, 98%), 1,3,5-trimethylbenzene (TMB, 98%), pentaethylenehexamine (PEHA,  
50 technical grade), and water- $^{18}\text{O}$  (97 atom %  $^{18}\text{O}$ ) were purchased from Sigma-Aldrich.  
51 Methanol (ACS certified), anhydrous ethanol (ACS certified), and sodium hydroxide  
52 (Pellet, ACS certified) were purchased from Fisher Scientific. Water used in preparation  
53 procedures was obtained from a Milli-Q system (18 M $\Omega$ ) except otherwise indicated. All  
54 other chemicals were obtained from commercial suppliers and used without further  
55 purification.

56 UV-Visible-NIR spectra were collected on an Agilent Technologies Cary 5000 UV-Vis-  
57 NIR.

58 TEM images were obtained on a FEI Tecnai G2 F20 200 kV Cryo-STEM with a Gatan  
59 Ultrascan 4000 4k x 4k CCD Camera System Model 895; EDS analysis was done by an  
60 EDAX Octane T Ultra W /Apollo XLT2 SDD and TEAM EDS Analysis System built on  
61 the STEM set up. TEM samples were prepared by drop-casting the solution on carbon-  
62 coated copper TEM grids (CF-400-Cu, 25/pk, carbon film on 400 Square Mesh copper  
63 grids, Electron Microscopy Science).

64 XPS spectra were recorded on a ThermoFisher Scientific K-alpha instrument equipped  
65 with a monochromatic Al K $\alpha$  X-ray source (1486.6 eV). Survey scans and high-  
66 resolution scans were collected on an X-ray spot size of 200  $\mu\text{m}$  with energy steps of 1  
67 and 0.1 eV, respectively. Spectral energies were calibrated by setting the C-C binding  
68 energy of C1s at 284.8 eV. Peak fitting was performed using the Thermo Avantage  
69 software (version 4.60). XPS samples were prepared by drop-casting a concentrated  
70 solution on a copper foil and dried in a vacuum oven overnight.

71 BET measurements were made on a Micromeritics TriStar 3000 Surface Area and Pore  
72 Size Analyzer. The analysis was performed by adsorption-desorption of nitrogen at  
73 77.350 K.

74 Pressured reactions were carried out on a Biotage® Endeavor™ Catalyst Screening  
75 System controlled by Endeavor® Advanced Software (EAS).

76  $^1\text{H}$  NMR and non-quantitative  $^{13}\text{C}$  NMR spectra were recorded with Bruker AVIIIHD  
77 500 MHz NMR Spectrometer in  $\text{D}_2\text{O}$ ; quantitative  $^{13}\text{C}$  NMR spectra were recorded with  
78 Bruker AVIIIHD 800 MHz NMR Spectrometer in  $\text{D}_2\text{O}$ .

79 GC-MS experiments were performed on an Agilent Technologies Gas Chromatograph  
80 System equipped with a 5973 *Inert* Mass Selective Detector. The column Rtx-5 (30m,  
81 0.25 mm ID, 0.25  $\mu\text{m}$  df) from Restek Corporation was used.

82 GC-TCD experiments were performed on an Agilent Gas Chromatograph (GC) 6890  
83 equipped with a Split/Splitless injector, an integrate valve switch and a thermal  
84 conductivity detector (TCD) was used for the reactor gas analysis. The GC was  
85 controlled by Chemstation Software. All injections were manual injections from a sealed  
86 gas bag. The syringe system used was VICI Precision Lock Syringe from a volume of 10  
87  $\mu\text{l}$  to 2000  $\mu\text{l}$ . Specifically:

88 **Injector:** The injector was used in split mode with a 10:1 split ratio. It was maintained at  
89 a constant 200  $^\circ\text{C}$  with a total flow of 163 ml/min. The carrier gas was argon (99.995%).  
90 The head pressure was maintained at 6.67 psi.

91 **Oven:** The oven was initially maintained at 30  $^\circ\text{C}$  for 9 minutes. It was then ramped at 50  
92  $^\circ\text{C}/\text{min}$  to 120  $^\circ\text{C}$  and then maintained there for 8 minutes. The total run time was 19  
93 minutes.

94 **Column:** Column 1 is an Agilent HP PLOT-Q column (30 m x 0.530 mm, 25.00 micron);  
95 Column 2 is an Agilent HP-PLOT MoleSieve ( 30 m x 0.530 mm, 20.00 micron).

96 **Detector:** The TCD was maintained at 210  $^\circ\text{C}$  the reference flow was set at 30 ml/min  
97 with Ar as the make-up gas at 0.6 ml/min. The filament was set to negative polarity.

98 **Switch Box:** The switch box was maintained at 100  $^\circ\text{C}$  with valve switches at 5.20  
99 minutes and 11.00 minutes.

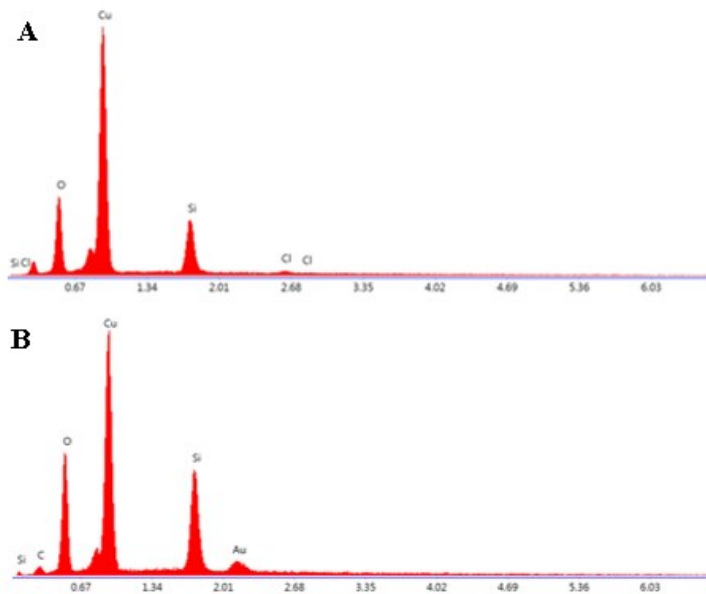

101 **2. Additional characterizations of Au/SiO<sub>2</sub>**

102 **Fig. S1.** EDS characterization of porous SiO<sub>2</sub> and Au/SiO<sub>2</sub>. EDS analysis of porous  
 103 silica beads (A) before and (B) after the AuNPs embedding. Similar to XPS, the EDS  
 104 study showed the presence of gold after the AuNP embedding.

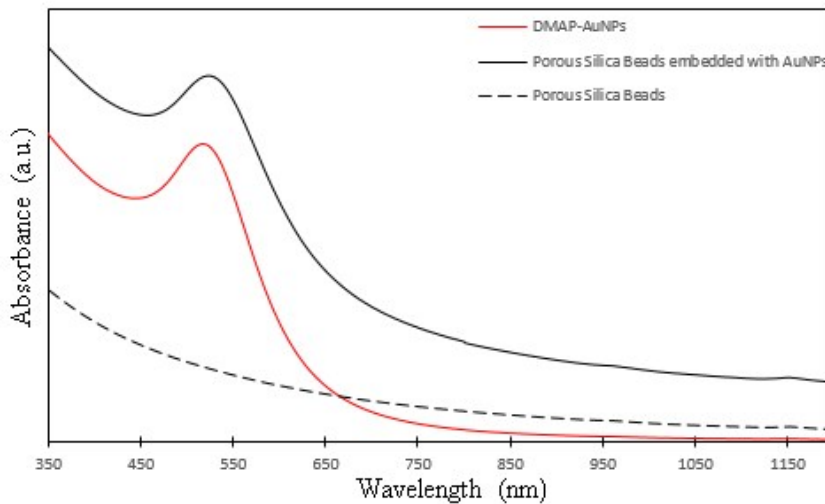

105

106 **Fig. S2.** UV-vis spectra of Au/SiO<sub>2</sub>, porous SiO<sub>2</sub> and AuNPs. DMAP-AuNPs (red solid  
 107 line); Porous silica beads before (black dash line) and after (black solid line) AuNPs

108 embedding. The resulting catalysts exhibited a similar UV-visible absorption (around 520  
109 nm) as the original AuNPs.

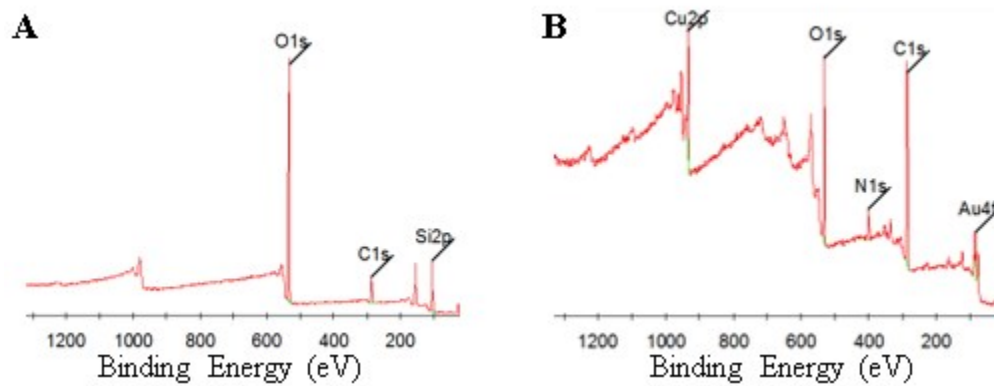

110

111 **Fig. S3.** XPS survey scan of (A) Porous SiO<sub>2</sub> beads and (B) DMAP-AuNPs.

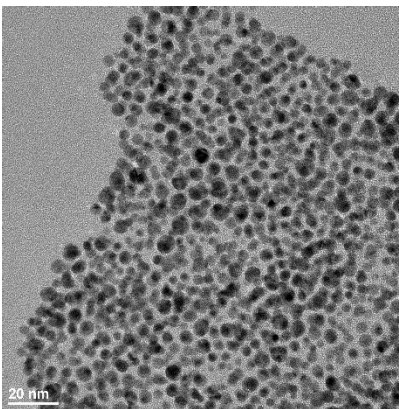

112

113 **Fig. S4.** TEM image of DMAP-AuNPs.

114

## 115 **Stability of Au/SiO<sub>2</sub>**

116 The aqueous solution of the Au/SiO<sub>2</sub> catalyst (3 mg/ml) was placed in a water bath  
117 sonication and was continuously sonicated for 17h.  
118 The comparison was made between the UV-visible absorption spectra of Au/SiO<sub>2</sub> before  
119 and after the sonication. It showed that there was negligible difference between the two  
120 UV-visible absorption spectra. TEM images of Au/SiO<sub>2</sub> before and after the sonication  
121 also showed there was no obvious difference. Both characterizations indicated that the  
122 interaction between gold and silica was relatively strong; the Au/SiO<sub>2</sub> was a stable  
123 catalyst.

124

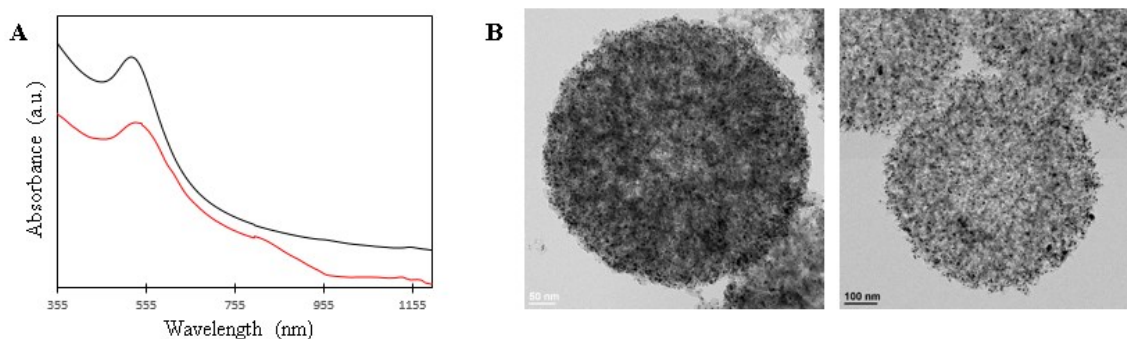

125

126 **Fig. S5.** Stability test of the Au/SiO<sub>2</sub>. A. UV-vis spectra of Au/SiO<sub>2</sub> before (black) and  
127 after (red) 17 h sonication; B. TEM images of Au/SiO<sub>2</sub> before (left) and after (right) 17 h  
128 sonication.; .

129

**Table S1. Zeta potential of various samples**

| Sample Name         | Zeta Potential/mV |
|---------------------|-------------------|
| DMAP-AuNPs          | 21.02             |
| porous silica beads | -29.81            |
| Au/SiO <sub>2</sub> | -19.25            |

130

### 131 **3. The weight percentage of Au in the Au/SiO<sub>2</sub> composite**

132 The weight percentage of Au in the Au/SiO<sub>2</sub> composite was determined by inductively  
133 coupled plasma optical emission spectrometry (ICP-OES).

134 Sample preparation: 100 μL aqua regia (excess amount) was added to 500 μL of Au/SiO<sub>2</sub>  
135 catalyst solution with a known concentration of SiO<sub>2</sub> (the concentration of SiO<sub>2</sub> was



136 calculated from the original weight of SiO<sub>2</sub> beads dissolved in the water). After the gold  
137 was completely dissolved, the solution was centrifuged, and the silica beads were  
138 removed. 292 μL of the supernatant was added into 11.708 mL of 2% (weight percentage)  
139 HNO<sub>3</sub>.

140 Characterization details: ICP-OES analysis was performed on a Thermo Scientific ICAP  
141 6000 series with Liquid Argon ICP-grade (Megs) as gas and RACID 86 Charge Injection  
142 Device (CID) as the detector.

143

#### 144 **4. Quantitative <sup>13</sup>C NMR**

145 To establish a quantitative <sup>13</sup>C NMR method, we took carbon relaxation time (T1) and  
146 Nuclear Overhauser Enhancement (NoE) into our criteria. Unless special mention, all the  
147 NMR samples for quantitative <sup>13</sup>C NMR contained 400 μL D<sub>2</sub>O, 300 μl PEHA CO<sub>2</sub>  
148 capture solution, and a known amount of imidazole (around 1 mmol). All the NMR  
149 spectra were taken at 25 °C.

150 T1 measurements were done on a Bruker AVIIIHD 800 MHz NMR Spectrometer. An  
151 NMR sample that contained 3.2 wt.% PEHA CO<sub>2</sub> capture solution was measured (Fig.  
152 S6). The longest T1 is 16.5s, belonging to bicarbonates. Given that the delay time (D1)  
153 should not be less than 5\*T1 in order to obtain a quantitative <sup>13</sup>C NMR, D1 was chosen to  
154 be 85s. To eliminate NoE, two pulse sequences can be used: zg and zgig. The internal  
155 standard imidazole was used as a compound to test if NoE is eliminated. Both pulse  
156 sequences fit our needs.

157 The final quantitative <sup>13</sup>C NMR method was chosen to have the following parameters:  
158 Number of Scan=128; D1=85s; zgig (an inverse gated-decoupling pulse sequence).

159

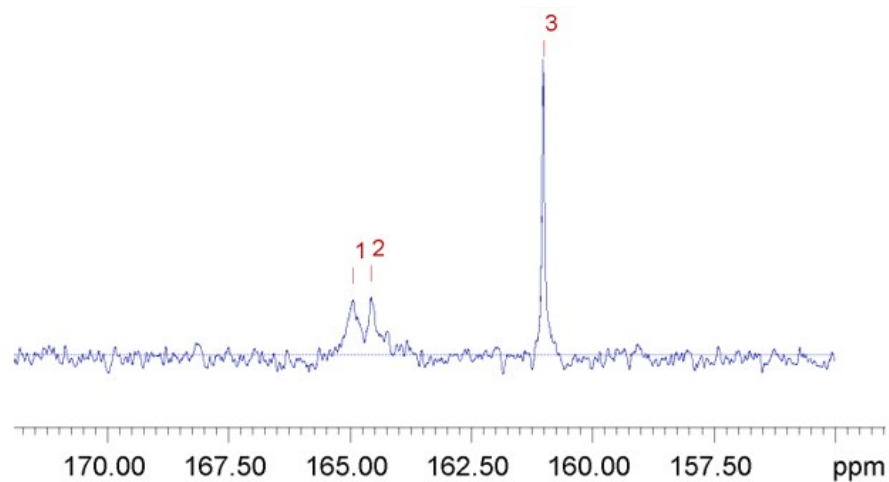

| Peak name | F2 [ppm] | lo       | error     | T1 [s] | error | a    | error   | fitInfo |
|-----------|----------|----------|-----------|--------|-------|------|---------|---------|
| 1         | 164.502  | 1.02e+07 | 1.907e+06 | 11.7   | 7.630 | 1.14 | 0.1999  | Done    |
| 2         | 164.110  | 9.79e+06 | 1.810e+06 | 5.86   | 3.458 | 1.41 | 0.2798  | Done    |
| 3         | 160.335  | 5.82e+07 | 1.505e+06 | 16.5   | 1.268 | 1.39 | 0.03198 | Done    |

160

161 **Fig. S6.**  $^{13}\text{C}$  NMR and T1 measurements of carbamates and bicarbonates in 3.2 wt.%

162 PEHA  $\text{CO}_2$  capture solution. Peak 1 and 2 are the signals of carbamates, and Peak 3 is the

163 signal of bicarbonates.

164

165

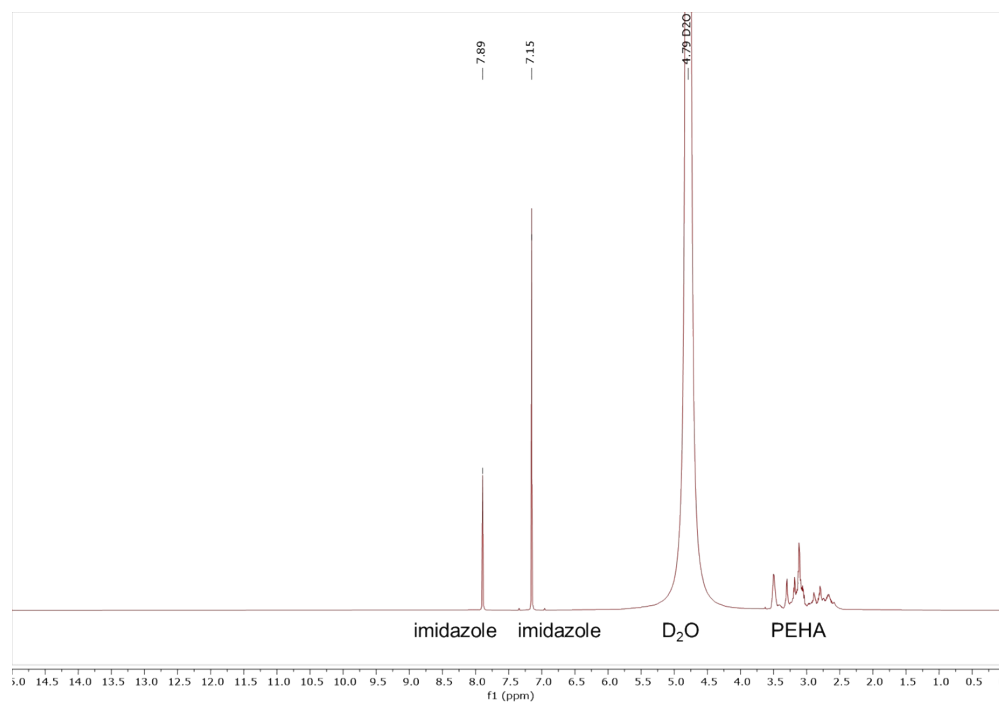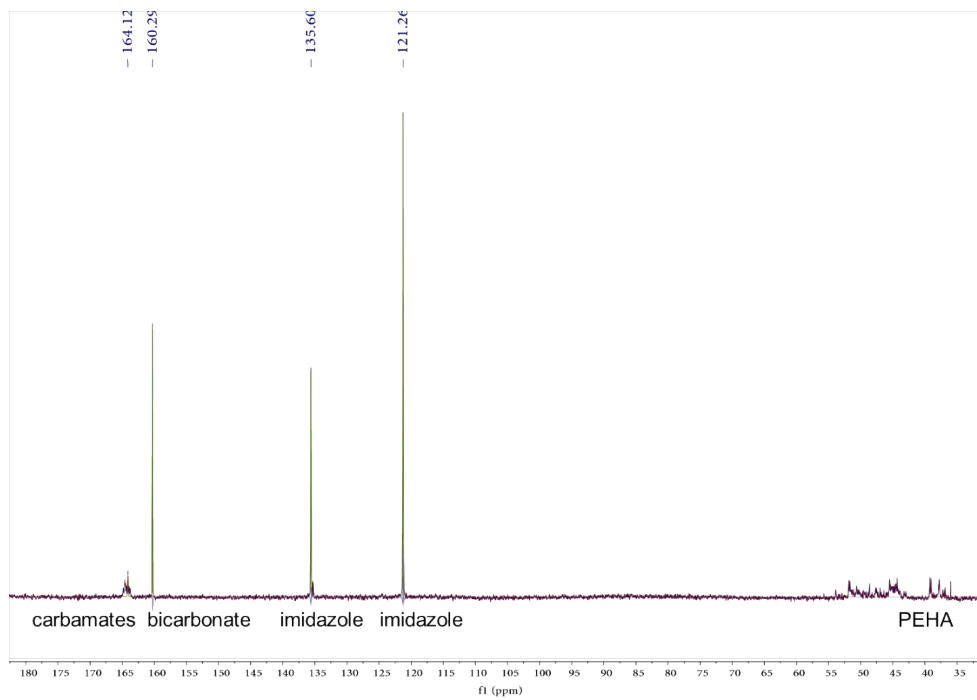

168 **Fig. S7.** NMR spectra of 3.2 wt. % PEHA CO<sub>2</sub> capture solution (imidazole as an internal  
169 standard). Above: <sup>1</sup>H NMR. Below: quantitative <sup>13</sup>C NMR.

170

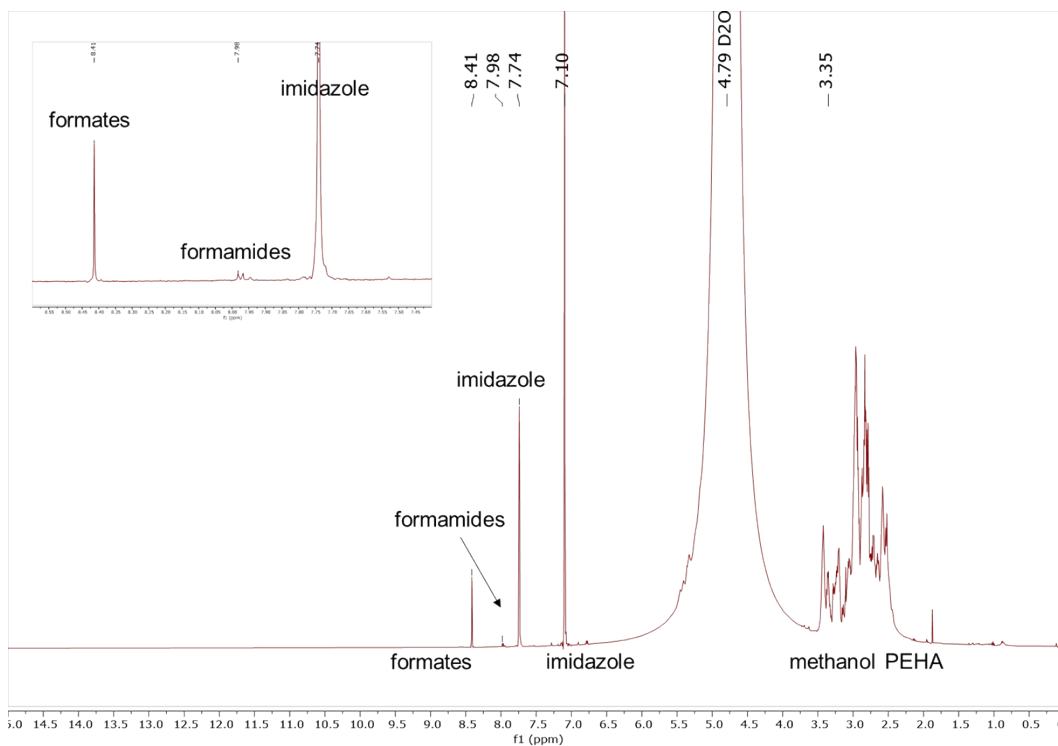

171

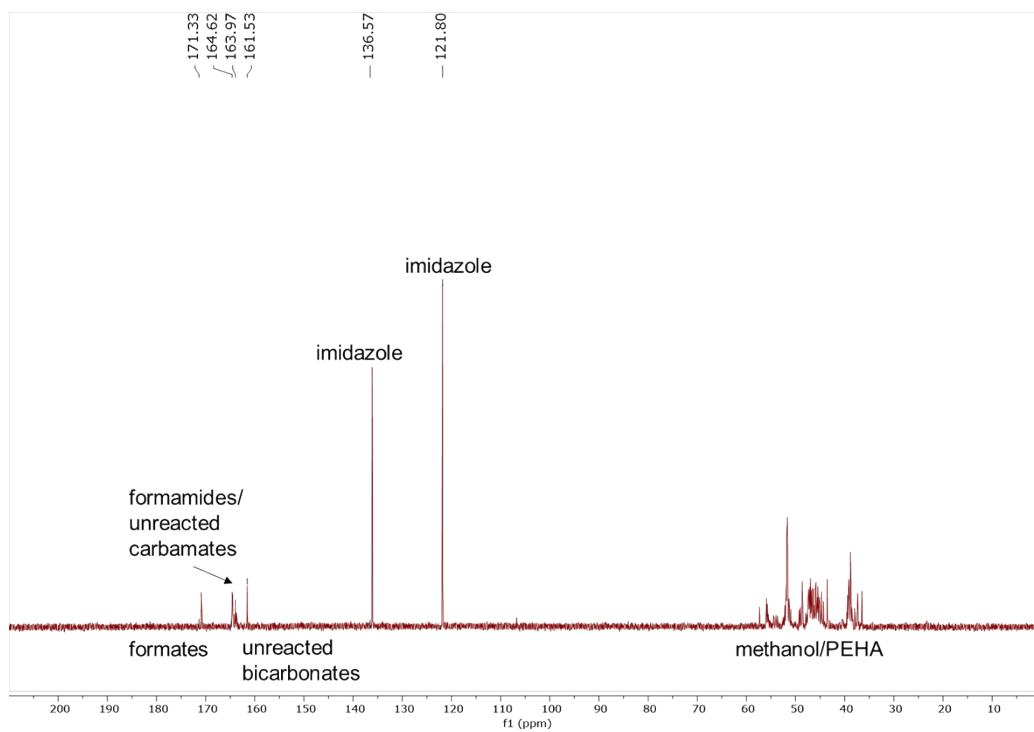

172

173 **Fig. S8.** NMR spectra of 3.2 wt. % PEHA CO<sub>2</sub> capture solution after hydrogenation  
 174 (imidazole as an internal standard). Above: <sup>1</sup>H NMR. Below: non-quantitative <sup>13</sup>C NMR.

175

176 **5. GC-TCD analysis of gas phase**

177 Gas phase after the hydrogenation was collected by a Tedlar® gas sampling bag.  
178 Specifically, the outlet of the Biotage® Endeavor™ Catalyst Screening System and a  
179 vacuum pump were connected to the gas sampling bag via a 3-way line connector valve.  
180 Firstly, the gas sampling bag and all the linings were vacuumed; secondly, the gas inside  
181 the high-pressure reactor was released into and gathered by the gas sampling bag; excess  
182 gas was evacuated as soon as the gas sampling bag was full by switching the 3-way valve.  
183

184 Blank (no gas injection), 1 ml of the gas phase after hydrogenation, and 0.5 ml of various  
185 gas standards (lab air, CO<sub>2</sub>, H<sub>2</sub>, CO, CH<sub>4</sub>, O<sub>2</sub>, N<sub>2</sub>) were analyzed by GC-TCD  
186 respectively. Each sample was repeated at least twice.

187 Table S2 shows the retention time of gas standards, as well as to-be-determined peaks  
188 presented in the gas phase after the hydrogenation. Fig. S9 shows the GC-TCD of the gas  
189 phase after the hydrogenation. CO<sub>2</sub>, O<sub>2</sub>, N<sub>2</sub> were from air trapped in the needle of the gas  
190 sampler syringe. H<sub>2</sub> was one of the reactants. CO was not detectable using this instrument  
191 and sampling method. Based on the limit of detection (LOD) and limit of analysis (LOA)  
192 (Section 6 Table S3), we conclude that the CO in the gas phase after the hydrogenation, if  
193 assuming it existed, should be below 0.05 ml.

194 ***Table S2. Retention time of various samples in GC-TCD***

A. Gas standards\*

| <b>Component</b>   | <b>CO<sub>2</sub></b> | <b>Noise</b> | <b>H<sub>2</sub></b> | <b>O<sub>2</sub></b> | <b>N<sub>2</sub></b> | <b>Noise</b> | <b>CH<sub>4</sub></b> | <b>CO</b> |
|--------------------|-----------------------|--------------|----------------------|----------------------|----------------------|--------------|-----------------------|-----------|
| Retention Time/min | 6.2                   | 9.1          | 13.3                 | 14.2                 | 14.9                 | 15.6         | 16.2                  | 17.1      |

B. Gas phase after hydrogenation\*\*

| <b>Component</b>   | <b>P1</b> | <b>P2</b> | <b>P3</b> | <b>P4</b> | <b>P5</b> | <b>P6</b> |
|--------------------|-----------|-----------|-----------|-----------|-----------|-----------|
| Retention Time/min | 6.1       | 9.1       | 13.0      | 14.0      | 14.8      | 15.4      |

195

196 \*The two noises are attributed to leaks in the injector and valve switch, appearing  
197 whenever an injection happens.

198 \*\*Reaction condition: 600 μL 3.2 wt. % PEHA CO<sub>2</sub> capture solution, 1 mL H<sub>2</sub>O  
199 containing 5.29 mg Au/SiO<sub>2</sub> and boric acid (1 mol % corresponding to the amount of

200 PEHA presented in the CO<sub>2</sub> capture solution), and 16 bar H<sub>2</sub> (25 °C). The entire system  
201 was stirred at 500 rpm, 100 °C for 36 hours.

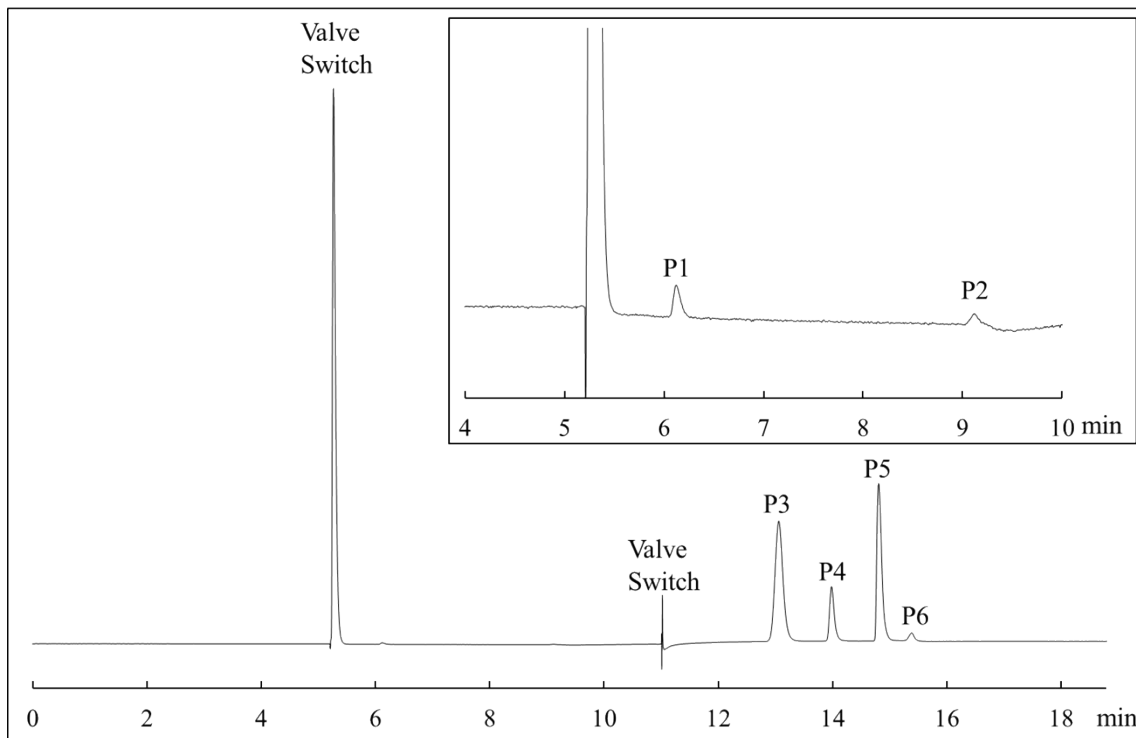

202

203 **Fig. S9.** GC-TCD of the gas phase after a typical hydrogenation reaction. The insert  
204 chromatograph is the zoom-in section of retention time= 4-10 min. According to *Table*  
205 *S2*, P1-P6 are identified to be CO<sub>2</sub>, noise, H<sub>2</sub>, O<sub>2</sub>, N<sub>2</sub>, and noise.

206

## 207 **6. Limit of detection (LOD) and limit of analysis (LOA) determination on GC-TCD**

208 In order to determine the LOD and the LOA, the GC was “injected” with a “blank  
209 sample” ten times.

210 The blank was the run initiated without a volume of gas introduced. The peak height was  
211 measured at the base corresponding to a gas analyte. The mean and standard deviation  
212 was determined. The LOD was three times the standard deviation at the point where the  
213 analyte peak should have occurred. The LOA was ten times the limit of detection. The  
214 signal was validated by the injection of a pure gas sample at the limit of detection.

215 Two gases, nitrogen and oxygen were excluded because of a constant leak from the  
216 switch valve.

217 The gas standard used in calibration is a certificated gas mixture purchased from Praxair  
 218 Canada Inc. The gas components and their molar concentrations can be found in Fig. S10.

219 **Table S3. Limits of detection (LOD) and limits of analysis (LOA) (ml) of gas**

| Gas             | LOD (ml) | LOA (ml) |
|-----------------|----------|----------|
| CO <sub>2</sub> | 0.005    | 0.01     |
| H <sub>2</sub>  | 0.005    | 0.01     |
| CO              | 0.05     | 0.1      |

220 **standard**

**CERTIFICATE OF ANALYSIS**  
*Certified Standard*

| Component       | Requested Concentration (Molar) | Certified Concentration (Molar) | Analytical Reference | Analytical Uncertainty |
|-----------------|---------------------------------|---------------------------------|----------------------|------------------------|
| Ethylene        | 5 %                             | 5.04 %                          | 1                    | ± 0.10%                |
| Methane         | 1 %                             | 1.00 %                          | 1                    | ± 0.02%                |
| Carbon monoxide | 1 %                             | 1.01 %                          | 1                    | ± 0.02%                |
| Hydrogen        | 5 %                             | 5.04 %                          | 1                    | ± 0.10%                |
| Carbon dioxide  | Balance                         | Balance                         |                      |                        |

Cylinder Style: **A3**                      Fill Date: **8/17/2020**                      Filling Method: **Transfill**  
 Cylinder Pressure @ 70°F: **659.64 psig**      Analysis Date: **8/18/2020**  
 Cylinder Volume: **.36 M3**  
 Valve Outlet Connection: **CGA 350**  
 Cylinder Number(s): **EA0017694**

Comments: **The analytical data and all QC contained in this Certificate of Analysis was reviewed and accepted by the following individual(s):**

221

222 **Fig. S10.** Certificate of the gas standard used in the calibration curves and the  
 223 determination of LOD and LOA.

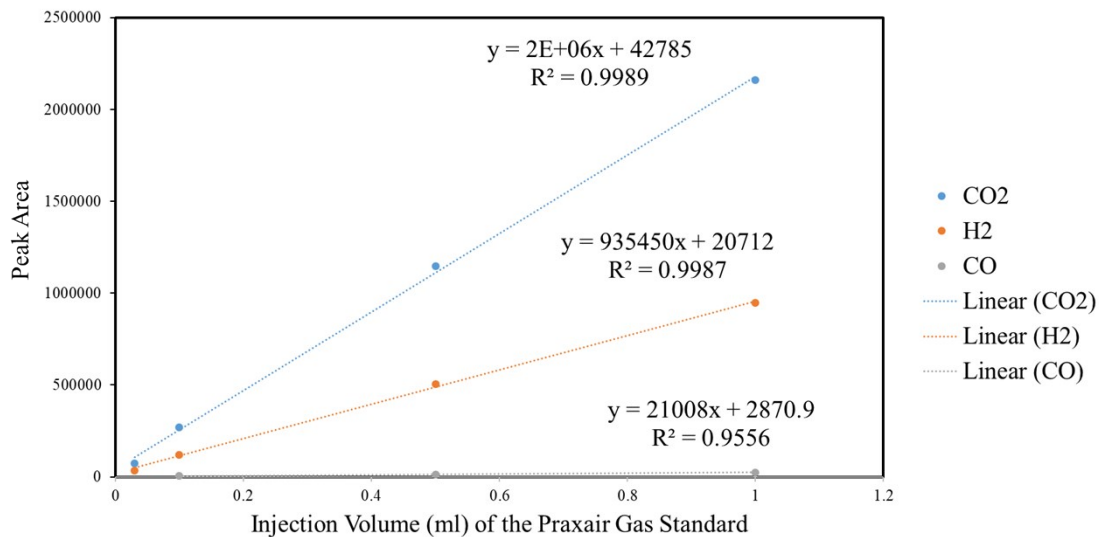

224 **Fig. S11.** Calibration curves. The injection volumes (ml) of the Praxair gas standard were  
 225 0.03, 0.1, 0.5, and 1.

226



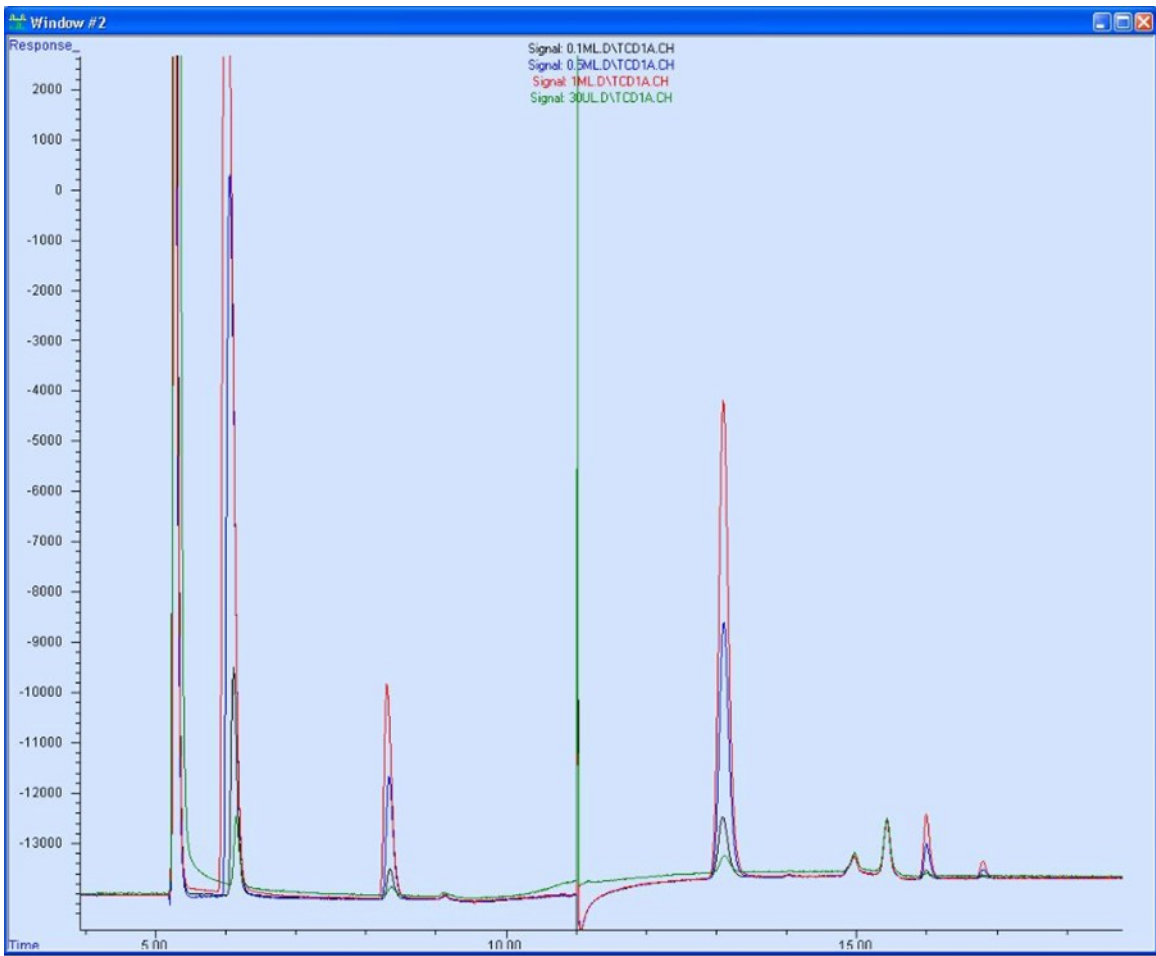

227 **Fig. S12.** Gas chromatographs of the gas standard with various injection volumes.

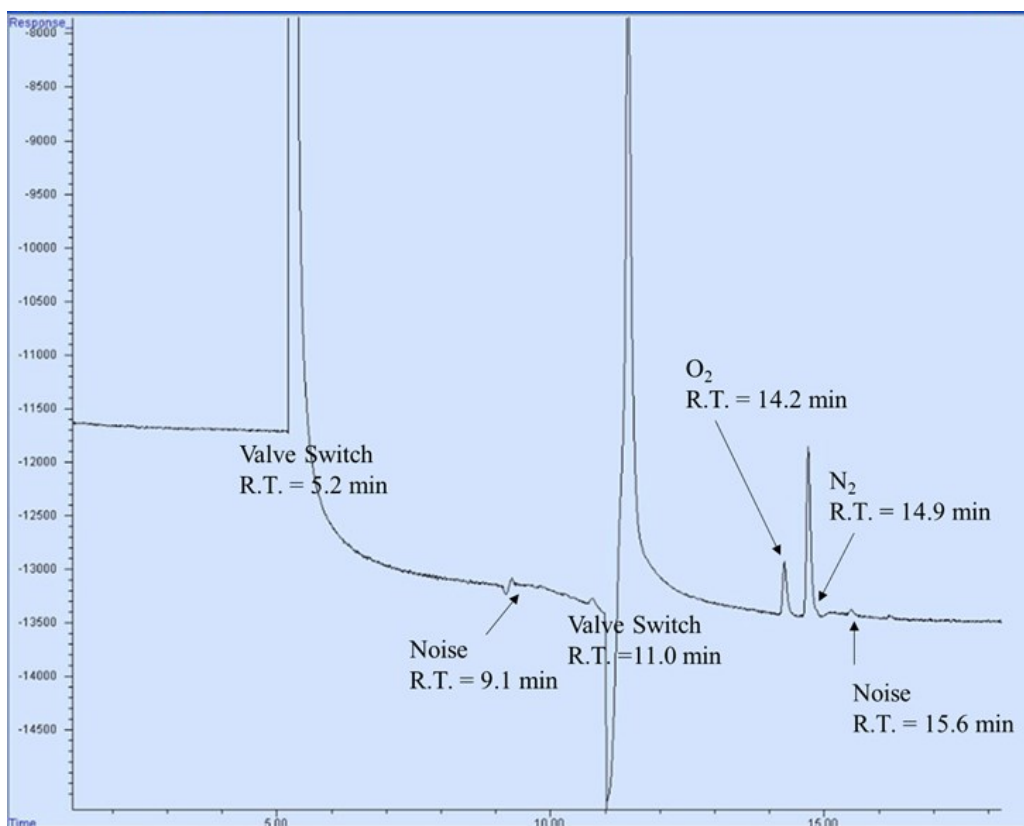

229

230 **Fig. S13.** Gas chromatographs of the blank (no gas injection).

231

## 232 **7. GC-MS identification and quantification of MeOH**

233 The signal of MeOH is within the regions of PEHA -CH<sub>2</sub>- in <sup>1</sup>H NMR. Sometimes, due  
 234 to low MeOH concentrations in reaction mixtures, it was difficult to quantify the yield of  
 235 MeOH depending on <sup>1</sup>H NMR. Thus, an additional step of GC-MS characterization was  
 236 used to identify and quantify the MeOH in the hydrogenated products.

237 The large quantities of salts (formate and unreacted bicarbonates) presented in the  
 238 product mixture made a direct injection of our liquid sample into a GC-MS unlikely. An  
 239 alternative sample injection method was thus developed. 100 μL sample was injected into  
 240 a pre-vacuumed chamber, resulting in the evaporation of volatile chemicals (like MeOH)  
 241 but not the salts. 1 mL gas sample was then taken from the chamber and injected into  
 242 GC-MS.

243 Compared to a standard aqueous solution containing MeOH, the reaction mixture had a  
244 similar peak with identical retention time and MS spectrum (Fig. S14). These are  
245 consistent with the presence of MeOH in the hydrogenation products.

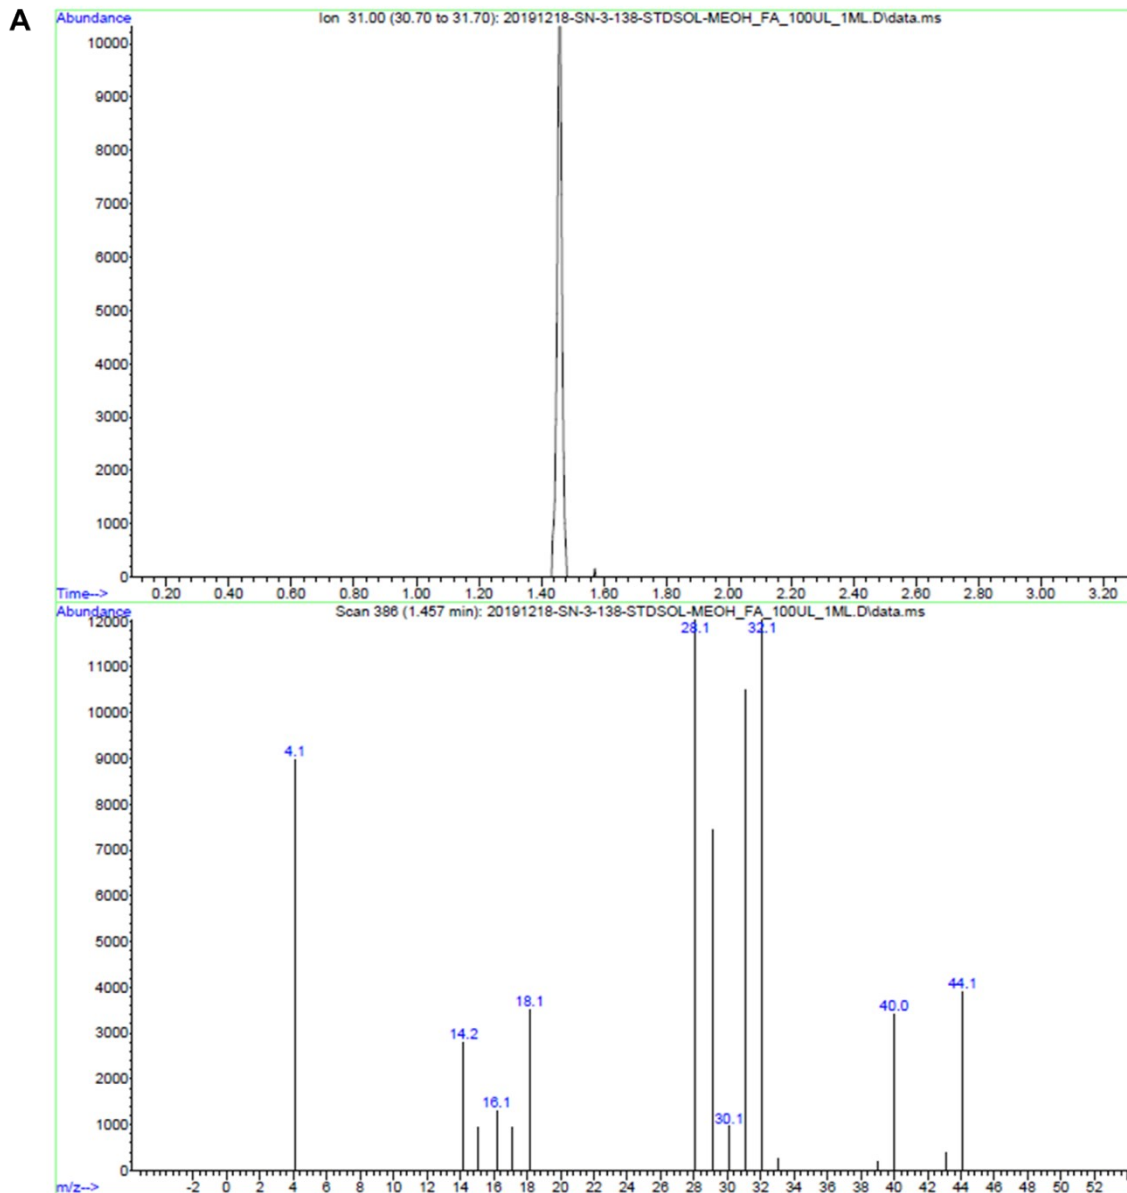

246

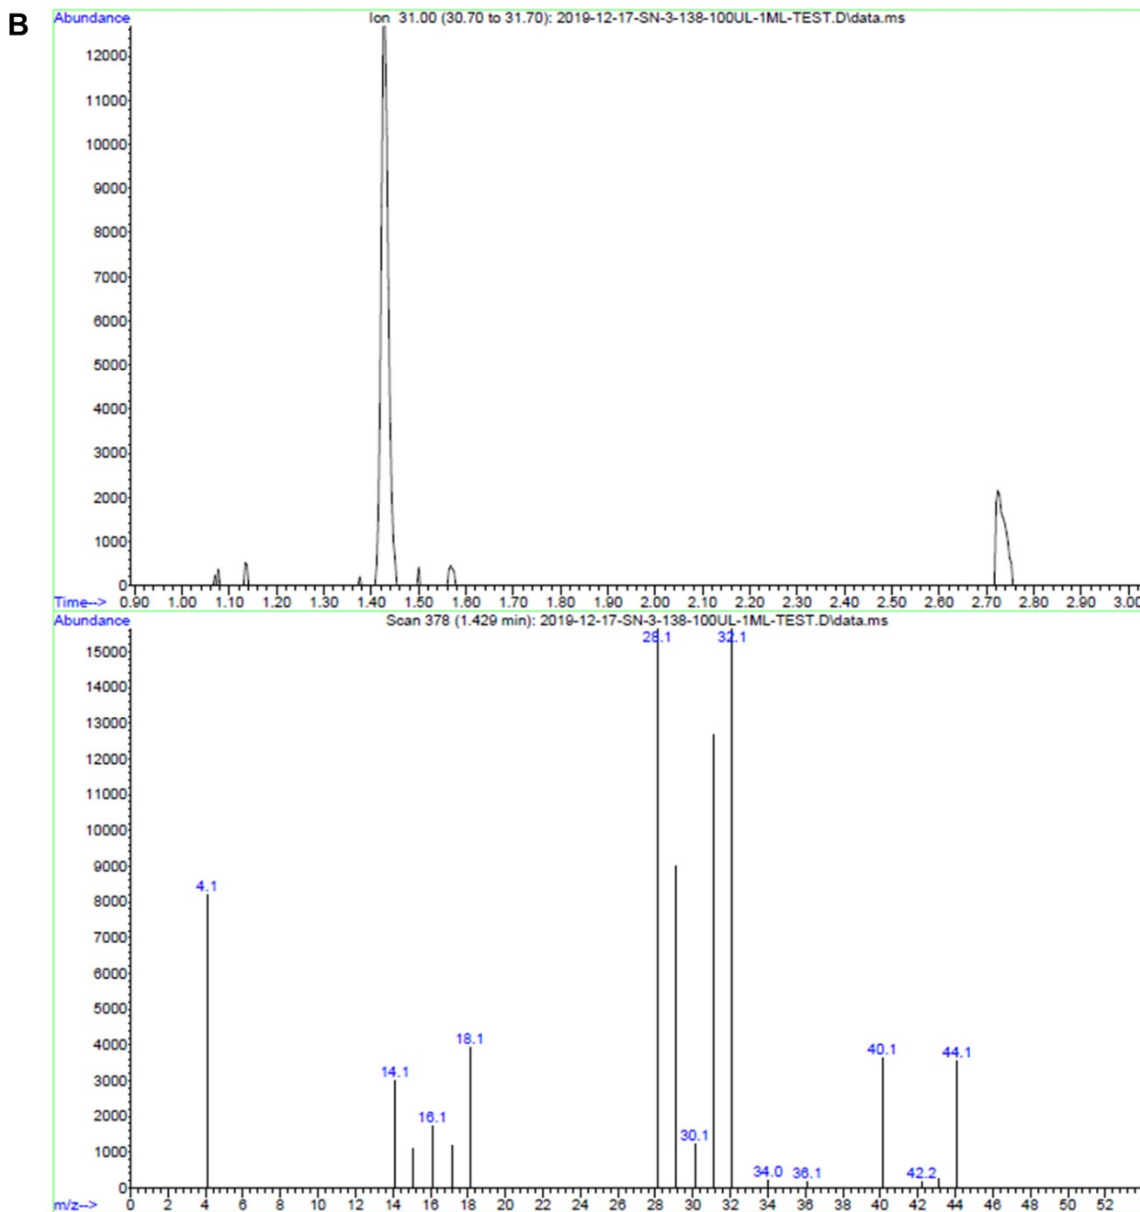

247

248 **Fig. S14.** GC-MS.

249 A. A standard aqueous solution containing MeOH and formic acid.

250 B. A reaction mixture after hydrogenation.

251 Both samples were treated with the same sample preparation/injection method. MeOH  
 252 has a retention time of 1.4 min in both A and B. The fragments from air were visible in  
 253 both MS spectra of A and B, because the dead volume in the gas sampler syringe made  
 254 air being also injected into the GC-MS.

255

## 256 **8. Mechanistic studies:<sup>18</sup>O isotope study**

257 To further understand the role of Pathways I and II in the generation of methanol,  
258 formamide was hydrogenated in H<sub>2</sub><sup>18</sup>O. After the reaction, a portion of the reaction  
259 mixture was analyzed by <sup>1</sup>H NMR with imidazole as an internal standard, to obtain the  
260 total quantity of methanol present. Another portion of the reaction mixture was analyzed  
261 by the procedure described in the previous section, *GC-MS identification and*  
262 *quantification of MeOH*, to identify Me<sup>18</sup>OH and quantify Me<sup>16</sup>OH (Fig. S15, B).

263 A methanol (Me<sup>16</sup>OH) standard solution in GC-MS establishes that methanol has a  
264 retention time of 1.205 min under the experimental conditions. This retention time was  
265 less than the one shown in Fig. S14, because approximately 1 m of the column was  
266 removed (cut) between these two experiments. This removal was necessitated by  
267 maintenance of the GC-MS. Fig. S15, B demonstrates the presence of Me<sup>18</sup>OH and  
268 Me<sup>16</sup>OH, with the former being dominant. It is notable that m/z=33.1 and m/z=34.1 occur  
269 naturally (Fig. S15 A), but with low abundances. Given the dramatic contrast between  
270 Fig. S15, A and B in terms of the abundances of these two ion fragments, we are  
271 confident in assigning the two ion fragments in B to Me<sup>18</sup>OH. A new ion fragment  
272 m/z=35.1 further establishes the existence of Me<sup>18</sup>OH.

### 273 *Semi-quantification methodology explanation*

274 One of the standard methods to quantify a chemical of interest is to build a calibration  
275 curve on the peak area of a primary ion fragment in ion fragment chromatogram, for  
276 example, m/z=29 or 31 in the case of methanol. (*J. Chromatogr. A 1017 (2003) 151–159*)

277 Nevertheless, this approach is not applicable in our case. On the one hand, the peak area  
278 of the m/z=31 in the ion fragment chromatogram of Fig. S15, B corresponds to two  
279 species: Me<sup>18</sup>OH and Me<sup>16</sup>OH. On the other hand, the peak area of m/z=29 is not usable  
280 either, given the primary interference from N<sub>2</sub> and the minor interference from formic  
281 acid. Although only 0.74% compared to the m/z=28 in the relative abundance (NIST  
282 Standard Reference Database 69: *NIST Chemistry WebBook*), the m/z=29 from N<sub>2</sub> arises  
283 as primary background noise in our case. Use of a methodology based on peak areas in an

284 ion fragment chromatogram to analyze Fig. S15, B will result in a peak area of  $m/z=29$   
285 consisting of  $N_2$ ,  $Me^{16}OH$ , and formic acid.

286 Considering the above, we decided to quantify  $Me^{16}OH$  based on the abundance of the  
287  $m/z=29$  in mass spectra at 1.205 min, the retention time of methanol. Similar methods are  
288 used in label-free quantitative proteomics (*Current Genomics*, 2008, 9, 263-274). The  
289 limited accuracy of this methodology is sufficient for this semi-quantification purpose,  
290 because this study is interested in which category the ratio of  $Me^{18}OH$  to  $Me^{16}OH$  falls  
291 into: 0, between 0 and 1, or  $\geq 1$ . The credibility of this method is based on:

- 292 a) the negligible presence of formic acid at 1.205 min;
- 293 b) the nearly identical retention time of  $Me^{18}OH$  and  $Me^{16}OH$ ;
- 294 c) the ability to quantify the exact  $N_2$  contribution to  $m/z=29$  at 1.205 min via running a  
295 blank solution;
- 296 d) the assumption that the chromatography peaks of  $Me^{18}OH$  and  $Me^{16}OH$  are  
297 symmetrical with nearly identical half peak widths.

#### 298 *Calibration curve and calculation of the ratio of $Me^{18}OH$ to $Me^{16}OH$*

299 In order to mimic the product distribution in typical  $CO_2$  hydrogenation catalyzed by our  
300  $Au(0)$  catalyst, we prepared the stock solution by adding 6  $\mu L$  formic acid (88%) and 6  
301  $\mu L$  methanol to 6 mL water. We diluted this stock solution into standard solutions, while  
302 the blank was water. The calibration curve and original data are shown in Fig. S16.  
303 Finally, we determined the mole ratio of  $Me^{18}OH$  to  $Me^{16}OH$  to be 3.5:1.

304

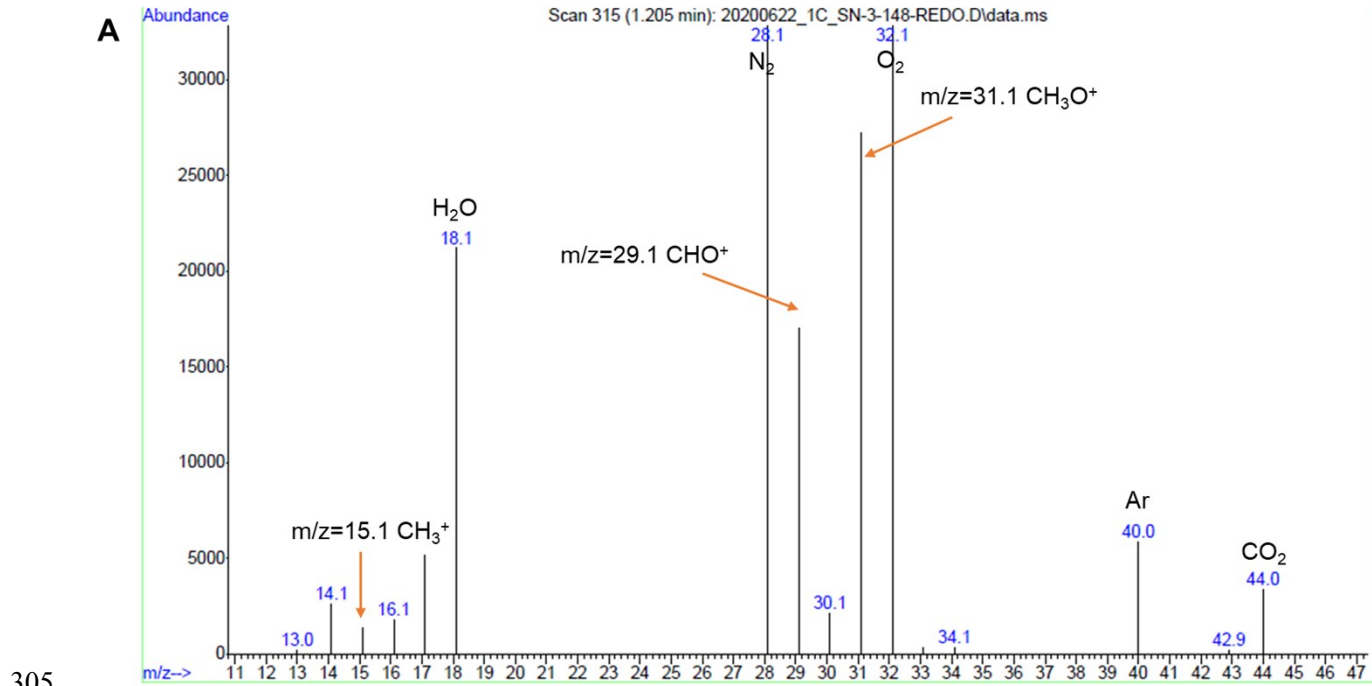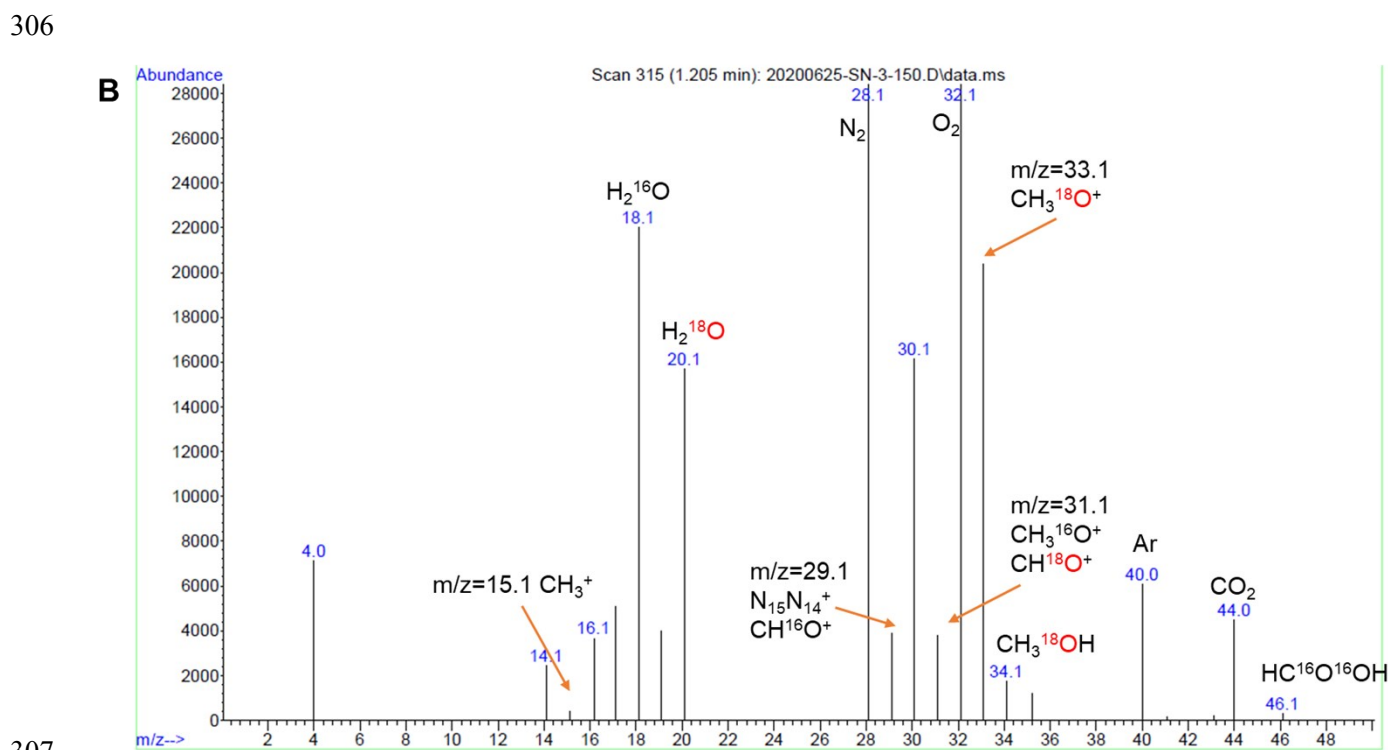

308 **Fig. S15.** Mass spectra.  
 309 A. A standard solution containing Me<sup>16</sup>OH and formic acid.  
 310 B. The reaction mixture after formamide hydrogenation in H<sub>2</sub><sup>18</sup>O. It is worth noticing that  
 311 the normalized abundance (after subtracting the N<sub>2</sub> background) of m/z=29 is 2127, about

312 half in the abundance of  $m/z=31$ , which is in agreement with a typical MS pattern of  
313  $\text{Me}^{16}\text{OH}$  where  $m/z=31$  is higher than  $m/z=29$ .

314

| A | [MeOH]/mol/L                                      | Abundance of $m/z=29$ | Normalized abundance of $m/z=29$ |
|---|---------------------------------------------------|-----------------------|----------------------------------|
|   | 0.00617                                           | 9011                  | 7242                             |
|   | 0.00308                                           | 5289                  | 3520                             |
|   | 0.00154                                           | 3388                  | 1619                             |
|   | 0.000771                                          | 2778                  | 1009                             |
|   | 0                                                 | *1769                 | 0                                |
|   | Formamide hydrogenation in $^{18}\text{O}$ -water | 3896                  | 2127                             |

B

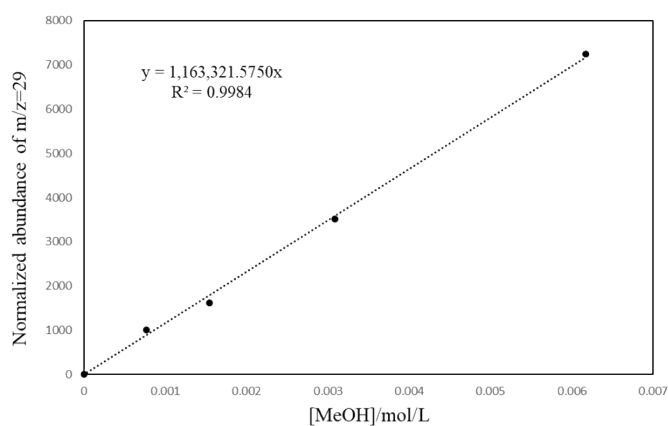

315

316 **Fig. S16.** Calibration curve.

317 A. Raw data showing the abundance of  $m/z=29$  at retention time=1.205 min. \*The  
318  $m/z=29$  signal in the blank is from  $M+1$  of  $\text{N}_2$ , constant background as the amount of  $\text{N}_2$   
319 presented in all the samples should be identical, given that the same sample preparation  
320 method, injection method, and injection syringe were used every time.

321 B. Calibration curve.

322



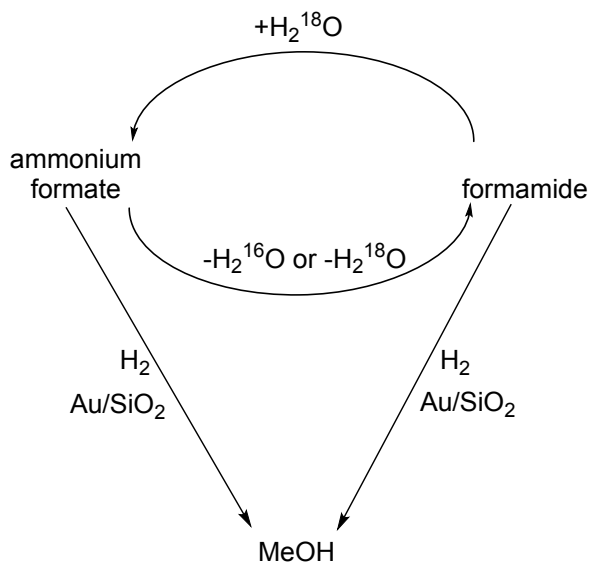

323

324 **Fig. S17.** Potential transformations in the isotopic studies.

325

### 326 **9. Additional studies**

327 **Table S4.** Recently reported systems of amine-captured CO<sub>2</sub> hydrogenation to C1

328 products in (partially) aqueous conditions similar to this work

| Catalyst                                    | Temp/°C | Base             | Solvent                           | P(H <sub>2</sub> /CO <sub>2</sub> )/bar | Time/h | Products                 | Conversion/%   | No. of cycles before catalysts lost 20% activity | Ambient air as CO <sub>2</sub> source: studied | Ref.         |
|---------------------------------------------|---------|------------------|-----------------------------------|-----------------------------------------|--------|--------------------------|----------------|--------------------------------------------------|------------------------------------------------|--------------|
| AuNP/SiO <sub>2</sub>                       | 100     | PEHA             | H <sub>2</sub> O                  | 16/3                                    | 48     | formate, formamide, MeOH | 80             | > 4                                              | Yes                                            | This work    |
| AuNC <sup>a</sup> /SiO <sub>2</sub> -Schiff | 90      | NEt <sub>3</sub> | H <sub>2</sub> O/MeOH (v:v=1:4)   | 50/30                                   | 12     | formate                  | - <sup>b</sup> | 1                                                | No                                             | <sup>1</sup> |
| Au/TiO <sub>2</sub>                         | 40      | NEt <sub>3</sub> | Neat                              | 90/90                                   | 72     | formate, CO              | 29             | > 12                                             | No                                             | <sup>2</sup> |
| Ru-MACHO-BH                                 | 145     | PEHA             | H <sub>2</sub> O/2M-THF (v:v=3:5) | 80/1                                    | 72     | formate, formamide, MeOH | 95             | >4                                               | Yes                                            | <sup>3</sup> |

329 a. AuNC stands for gold nanoclusters (d = ~1.5 nm). b. The yield or the conversion was  
330 not given.

331

332 Reference:

333 1. Q. Liu, X. Yang, L. Li, S. Miao, Y. Li, Y. Li, X. Wang, Y. Huang and T. Zhang,  
334 *Nature Communications*, 2017, **8**, 1407.

- 335 2. D. Preti, C. Resta, S. Squarcialupi and G. Fachinetti, *Angewandte Chemie*  
 336 *International Edition*, 2011, **50**, 12551-12554.  
 337 3. S. Kar, R. Sen, A. Goeppert and G. K. S. Prakash, *Journal of the American*  
 338 *Chemical Society*, 2018, **140**, 1580-1583.

339

340 **Table S5.** Study of CO<sub>2</sub> hydrogenation in dilute PEHA solutions

| Entry | wt % of PEHA in water | CO <sub>2</sub> capture                           |                                                                               |                                                                                            | Hydrogenation <sup>b</sup> |                            |                       | Conversion(%) <sup>c</sup> |
|-------|-----------------------|---------------------------------------------------|-------------------------------------------------------------------------------|--------------------------------------------------------------------------------------------|----------------------------|----------------------------|-----------------------|----------------------------|
|       |                       | Mole ratio of carbamate: bicarbonate <sup>a</sup> | CO <sub>2</sub> capacity <sup>a</sup> (mmol of CO <sub>2</sub> /(g of PEHA) ) | CO <sub>2</sub> capacity <sup>a</sup> (mmol of CO <sub>2</sub> /(ml of capture solution) ) | Product distribution       |                            |                       |                            |
|       |                       |                                                   |                                                                               |                                                                                            | Formate (%) <sup>c</sup>   | Formamide (%) <sup>c</sup> | MeOH (%) <sup>c</sup> |                            |
| 1     | 3.2                   | 1:1                                               | 14.45                                                                         | 0.49                                                                                       | 55                         | 44                         | 1                     | 68                         |
| 2     | 1.6                   | 1:2                                               | 8.06                                                                          | 0.26                                                                                       | 38                         | 54                         | 8                     | 16                         |
| 3     | 0.8                   | 1:5                                               | 12.54                                                                         | 0.10                                                                                       | 24                         | 54                         | 22                    | 40                         |

341

342 Notes: a. The CO<sub>2</sub> capacity, identification and quantification of carbamate and  
 343 bicarbonate were determined by quantitative <sup>13</sup>C NMR with imidazole as an internal  
 344 standard. b. Hydrogenation reaction conditions: 600 μL CO<sub>2</sub> capture solution, 1 mL H<sub>2</sub>O  
 345 containing 5.29 mg Au/SiO<sub>2</sub> and boric acid (1 mol % corresponding to the amount of  
 346 PEHA presented in the CO<sub>2</sub> capture solution), and 16 bar H<sub>2</sub> (25 °C). The entire system  
 347 was stirred at 500 rpm, 100 °C for 36 hours. c. The selectivity and overall conversion  
 348 were based on <sup>1</sup>H NMR with imidazole as an internal standard.

349

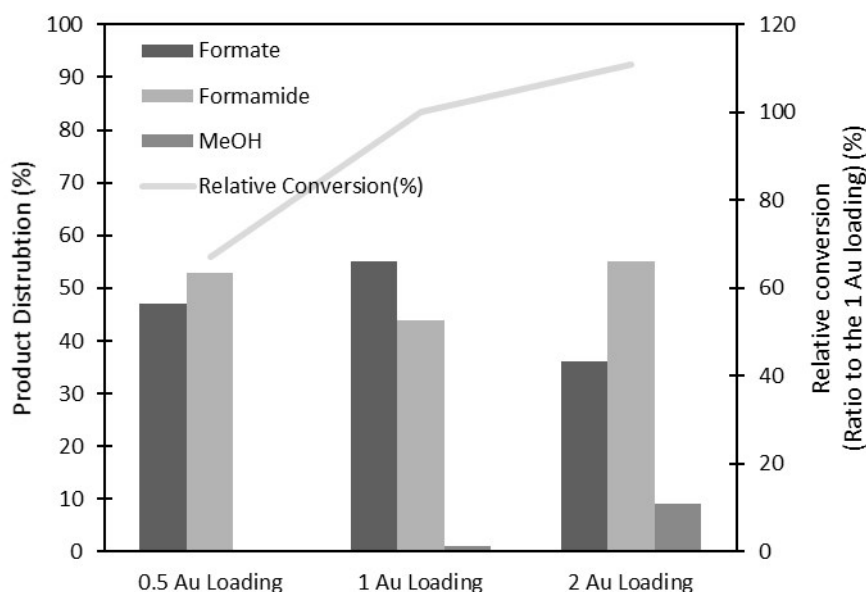

350

351 **Fig. S18.** Catalytic activities with different Au loadings. 1 Au loading meant 5.29 mg  
 352 Au/SiO<sub>2</sub>; 2 Au loading meant 10.58 mg Au/SiO<sub>2</sub>, etc. Reaction conditions: 600 μL 3.2 wt. %  
 353 PEHA CO<sub>2</sub> capture solution, 1 mL H<sub>2</sub>O containing Au/SiO<sub>2</sub> and boric acid(1 mol %  
 354 corresponding to the amount of PEHA presented in the CO<sub>2</sub> capture solution), and 16 bar  
 355 H<sub>2</sub> (25 °C). The entire system was stirred at 500 rpm, 100 °C for 36 hours.  
 356

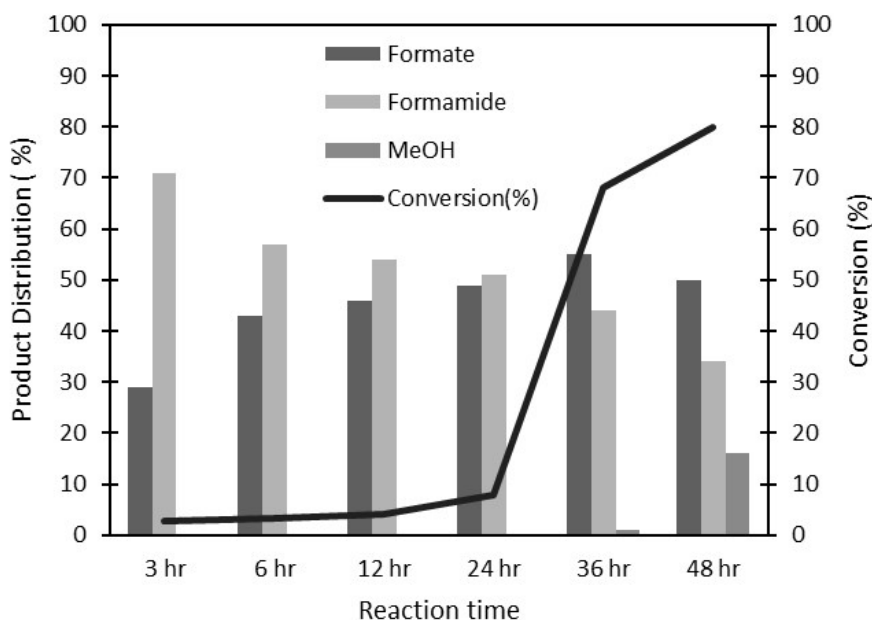

357

358 **Fig. S19.** Product distribution and conversion with various reaction times. Reaction  
 359 conditions: 600 μL 3.2 wt. % PEHA CO<sub>2</sub> capture solution, 1 mL H<sub>2</sub>O containing 5.29 mg  
 360 Au/SiO<sub>2</sub> and boric acid(1 mol % corresponding to the amount of PEHA presented in the  
 361 CO<sub>2</sub> capture solution), and 16 bar H<sub>2</sub> (25 °C). The entire system was stirred at 500 rpm,  
 362 100 °C.
